# Supplementary material for: Protective effects of safranal on hypoxia/reoxygenation-induced injury in H9c2 cardiac myoblasts via the PI3K/AKT/GSK3β signaling pathway
Source: PubMed Central journal article supplement — Exp Ther Med. 2021 Oct 1;22(6):1400. doi: 10.3892/etm.2021.10836 (PMC8524664; doi:10.3892/etm.2021.10836), 2021-10-01

Figure S1. Effect of SFR post-treatment on H9c2 cardiac myoblasts. Effects of SFR on (A) cell viability (B) LDH (C) CK-MB, (D) SOD, (E) MDA and (F) caspase-3 levels. Data are presented as the mean  $\pm$  SEM. n=6. \*\*P<0.01 vs. CONT; and #P<0.05, ##P<0.01 vs. H/R group. SFR, safranal; CONT, control; H/R, hypoxia/reoxygenation; SOD, superoxide dismutase; MDA, malondialdehyde; LDH, lactate dehydrogenase; CK-MB, creatine kinase-MB.

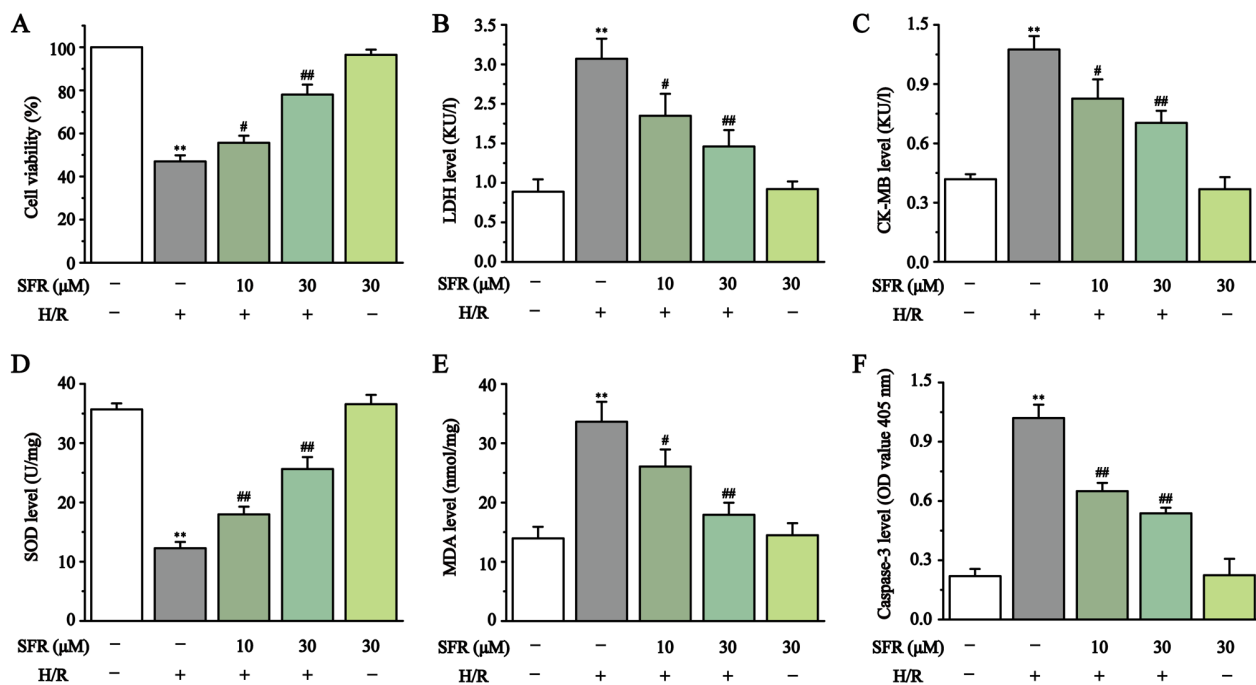

Supplement: Supplementary_Data.pdf [file Supplementary_Data.pdf]
